# Supplementary material
Source: Elsevier journal article supplement (https://univ-rennes.hal.science/hal-00843111v1/file/mmc4.pdf)

**Supplemental file. Figure 1.**

Electron micrograph of CC398 *S. aureus* phages S100- $\phi$  isolated from the non-LA isolate S100.

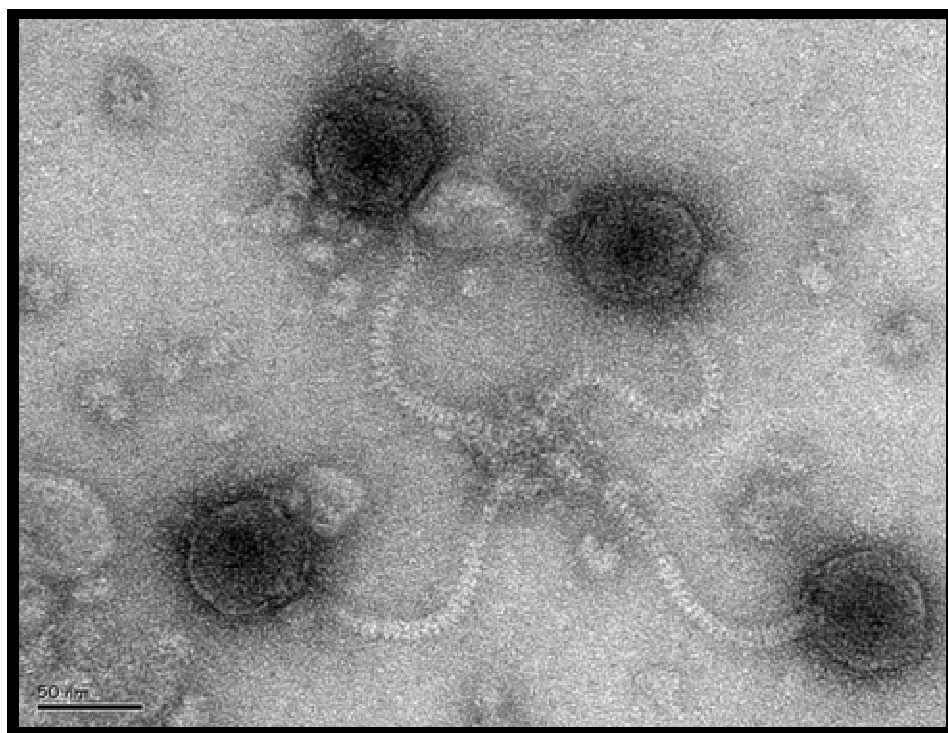

Supplement: mmc4 [file mmc4.pdf]
